# Supplementary material for: Aluminium localization in root tips of the aluminium-accumulating plant species buckwheat (Fagopyrum esculentum Moench)
Source: PubMed Central journal article supplement — J Exp Bot. 2011 Aug 9;62(15):5453–62. doi: 10.1093/jxb/err222 (PMC3223043; doi:10.1093/jxb/err222), 2011-08-09
Supplement: supp_err222_00062307_file001.pdf [file supp_err222_00062307_file001.pdf]

## **Aluminium localisation in root tips of the aluminium-accumulating plant species buckwheat (*Fagopyrum esculentum* Moench)**

*Benjamin Klug, André Specht, and Walter J Horst*

Supplementary figure 1. Aluminium distribution in cross sections of primary root tips after 24 h Al treatment in minimal nutrient solution containing 500  $\mu\text{M}$   $\text{CaCl}_2$ , 8  $\mu\text{M}$   $\text{H}_3\text{BO}_3$  and 75  $\mu\text{M}$   $\text{AlCl}_3$  at pH 4.3 in a distance of 0-30 mm from the root tip. Root tips were agarose-embedded and free-hand sectioned. (A) shows the overview of the Al distribution in the first 5 mm section (B) shows a close up of the marked section in A. Yellow arrow indicate a cell with intact cytoplasm showing high symplastic fluorescence intensity, white arrow indicate a damaged and thus empty cell. Scale bar represents 200  $\mu\text{m}$  at 100-fold magnification (B excluded).

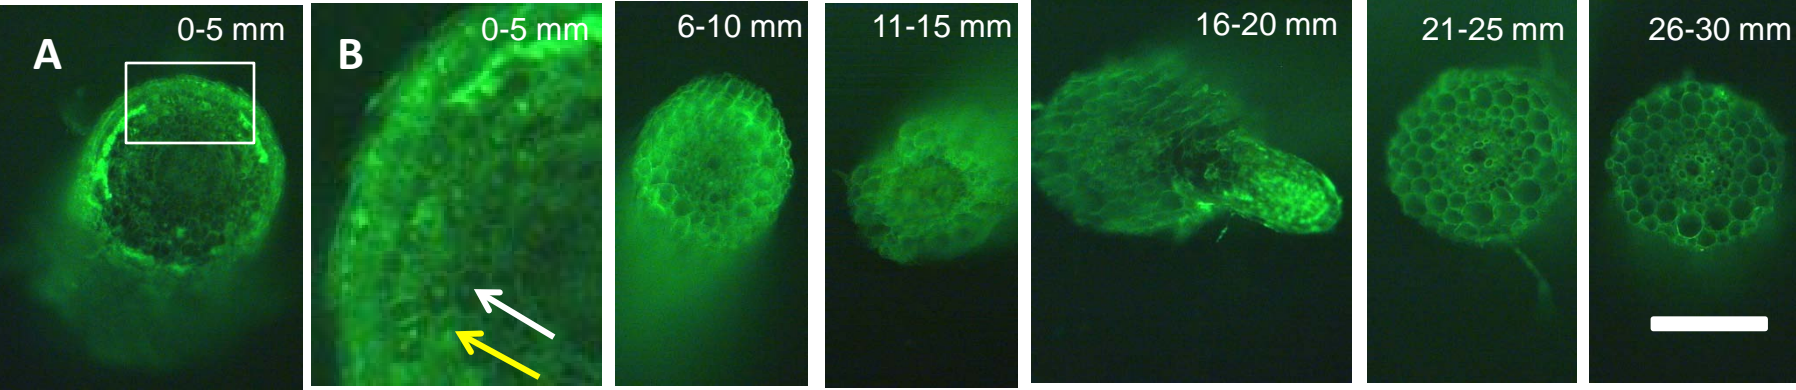

Supplemental figure 1
